# Supplementary material for: Resistance Mechanisms Influencing Oncolytic Virotherapy, a Systematic Analysis
Source: Vaccines (Basel). 2021 Oct 12;9(10):1166. doi: 10.3390/vaccines9101166 (PMC8537623; doi:10.3390/vaccines9101166)
Supplement: Supplementary file 1 [file vaccines-09-01166-s001.zip › Supplementary table S1.xlsx]

## Sheet: Sheet1
First Author	PMID	Virus	Cancer_Type	Resistance_mechanism	Resistance_Source	Journal/Book	Year	DOI	"resistance"[tiab] AND "oncolytic"[tiab]
Stevenson AJ	10917547	Herpes simplex virus	Pancreatic cancer	Heterogenity	Tumor cells	Br J Cancer	2000	10.1054/bjoc.2000.1346
Sunamura M	15084981	Adenovirus	Pancreatic cancer	Cell survival	Tumor cells	Pancreas	2004	10.1097/00006676-200404000-00022
Reinblatt M	15166969	Herpes simplex virus	Colorectal cancer	Hypoxia	Tumor microenvironment	Ann Surg	2004	10.1097/01.sla.0000128308.36393.38
Parikh NS	15570577	Adenovirus	Neuroblastoma	Heterogenity	Tumor cells	Pediatr Blood Cancer	2005	10.1002/pbc.20268
Bieler A	16409125	Adenovirus	Glioblastoma	Epigenetic modification	Tumor cells	Hum Gene Ther	2006	10.1089/hum.2006.17.55
Carey BL	18829743	Vesicular Stomatitis Virus	Prostate cancer	Interferon signaling	Tumor cells	J Virol	2008	10.1128/JVI.01508-08
Saloura V	19715403	Vesicular Stomatitis Virus	Pleural mesothelioma	Interferon signaling	Tumor cells	Hum Gene Ther	2010	10.1089/hum.2009.088
Tseng JC	19798121	Sindbis Virus	Neuroblastoma	Spatial distribution	Endothelial cells	Cancer Gene Ther	2010	10.1038/cgt.2009.70
Valyi-Nagy K	19893596	Herpes simplex virus	Melanoma	Extracellular barriers	Extracellular matrix	Cancer Gene Ther	2010	10.1038/cgt.2009.73
Watanabe Y	19935710	Adenovirus	Pleural mesothelioma	Spatial distribution	Tumor cells	Oncogene	2010	10.1038/onc.2009.415
Diallo JS	20389287	Vesicular Stomatitis Virus	Breast cancer	Interferon signaling	Tumor cells	Mol Ther	2010	10.1038/mt.2010.67
Fu X	21128236	Herpes simplex virus	Multiple Tumor types	Cell survival	Tumor cells	Int J Cancer	2011	10.1002/ijc.25808
Janelle V	21561919	Vesicular Stomatitis Virus	Multiple Tumor types	Heterogenity	Tumor cells	J Virol	2011	10.1128/JVI.02484-10
Paglino JC	21734048	Vesicular Stomatitis Virus	Multiple Tumor types	Interferon signaling	Tumor cells	J Virol	2011	10.1128/JVI.00723-11
Liikanen I	21792178	Adenovirus	Ovarian cancer	Interferon signaling	Tumor cells	Mol Ther	2011	10.1038/mt.2011.144
Song TJ	22015641	Herpes simplex virus	Multiple Tumor types	multiple pathways	Tumor cells	Cancer Gene Ther	2012	10.1038/cgt.2011.64
Biswas M	22973037	Newcastle disease virus	Cervical cancer	Complement activation	Complement System	J Virol	2012	10.1128/JVI.00886-12
Vähä-Koskela MJ	23221568	Semliki forest virus and Vaccinia virus	Glioma	Interferon signaling	Tumor cells	J Virol	2013	10.1128/JVI.01609-12
Moerdyk-Schauwecker M	23246628	Vesicular Stomatitis Virus	Pancreatic cancer	Interferon signaling	Tumor cells	Virology	2013	10.1016/j.virol.2012.11.014
Noll M	23612727	Measles Virus	Multiple Tumor types	Epigenetic modification	Tumor cells	Int J Oncol	2013	10.3892/ijo.2013.1914
Le Bœuf F	23764612	Vesicular Stomatitis Virus	Multiple Tumor types	Interferon signaling	Tumor cells	Nat Commun	2013	10.1038/ncomms2974
Batenchuk C	23852158	Rhabdovirus	Leukemia	Cell survival	Tumor cells	Blood Cancer J	2013	10.1038/bcj.2013.23
Liu YP	23921465	Vesicular Stomatitis Virus	Multiple Tumor types	Interferon signaling	Macrophage	Sci Rep	2013	10.1038/srep02375
Shulak L	24371063	Vesicular Stomatitis Virus	Prostate cancer	Epigenetic modification	Tumor cells	J Virol	2014	10.1128/JVI.03406-13
Buijs PR	24384773	Newcastle disease virus	Pancreatic cancer	Interferon signaling	Tumor cells	Cancer Gene Ther	2014	10.1038/cgt.2013.78
Voros A	24455304	Herpes simplex virus	Multiple Tumor types	Extracellular barriers	Extracellular matrix	ISRN Oncol	2013	10.1155/2013/104913
Tong Y	24535016	Adenovirus	Myeloma	Cell survival	Tumor cells	Oncol Rep	2014	10.3892/or.2014.3020
Colunga A	24553345	Herpes simplex virus	Melanoma	Cell survival	Tumor cells	Gene Ther	2014	10.1038/gt.2014.6
Paglino JC	24554651	Parvovirus	Multiple Tumor types	Interferon signaling	Tumor cells	J Virol	2014	10.1128/JVI.03508-13
Cronin M	24569832	Vesicular Stomatitis Virus	Multiple Tumor types	Heterogenity	Tumor cells	Mol Ther	2014	10.1038/mt.2014.23
Gholami S	24924199	Herpes simplex virus	Breast cancer	Cell survival	Tumor cells	Cancer Gene Ther	2014	10.1038/cgt.2014.28
Jiang K	25078870	Newcastle disease virus	Lung cancer	Cell survival	Tumor cells	BMC Cancer	2014	10.1186/1471-2407-14-551
Zemp FJ	25336188	Myxoma virus	Glioma	Cellular immunity	Immune cells	Cancer Res	2014	10.1158/0008-5472.CAN-14-0876
Friedman GK	25427614	Herpes simplex virus	Glioblastoma	Heterogenity	Tumor cells	Gene Ther	2015	10.1038/gt.2014.107
Lucas T	25692292	Adenovirus	Pancreatic cancer	Entry	Tumor cells	PLoS One	2015	10.1371/journal.pone.0117254
Kaowinn S	25727013	Parvovirus	Pancreatic cancer	Interferon signaling	Tumor cells	Biochem Biophys Res Commun	2015	10.1016/j.bbrc.2015.02.107
Hastie E	25965802	Vesicular Stomatitis Virus	Pancreatic cancer	Cell survival	Tumor cells	Virology	2015	10.1016/j.virol.2015.04.017
Westcott MM	25995245	Vesicular Stomatitis Virus	Head and neck cancer	Interferon signaling	Tumor cells	J Virol	2015	10.1128/JVI.00757-15
Cataldi M	26331681	Vesicular Stomatitis Virus	Pancreatic cancer	Cell survival	Tumor cells	Virology	2015	10.1016/j.virol.2015.08.003
Su BH	26515462	Adenovirus	Multiple Tumor types	Cell survival	Tumor cells	Oncotarget	2015	10.18632/oncotarget.5702
Yumul R	26993072	Adenovirus	Multiple Tumor types	Spatial distribution	Epithelial cells	Hum Gene Ther	2016	10.1089/hum.2016.022
Vähä-Koskela M	27119097	Adenovirus and Poxvirus	Multiple Tumor types	Heterogenity	Tumor cells	Mol Ther Oncolytics	2015	10.1038/mto.2014.6
Lv C	27208781	Vaccinia virus	Lung cancer	Cell survival	Tumor cells	Biochem Biophys Res Commun	2016	10.1016/j.bbrc.2016.05.088
Hou W	27374223	Vaccinia virus	Multiple Tumor types	Tumor growth factors	Tumor microenvironment	Cancer Cell	2016	10.1016/j.ccell.2016.05.012
Sun CW	27458571	Reovirus	Melanoma	Spatial distribution	Erythrocytes	Front Oncol	2016	10.3389/fonc.2016.00166
Hastie E	27533247	Vesicular Stomatitis Virus	Pancreatic cancer	Interferon signaling	Tumor cells	Oncotarget	2016	10.18632/oncotarget.11202
Dold C	27738655	Vesicular Stomatitis Virus	Ovarian cancer	Interferon signaling	Tumor cells	Mol Ther Oncolytics	2016	10.1038/mto.2016.21
Lee NH	27901484	Vaccinia virus	Hematological cancer	multiple pathways	Immune cells	Oncotarget	2017	10.18632/oncotarget.13598
Dobson CC	27966453	Vesicular Stomatitis Virus	Rhabdomyosarcoma	Cell survival	Tumor cells	Oncotarget	2017	10.18632/oncotarget.13849
Allagui F	28042780	Measles Virus	Melanoma	Interferon signaling	Tumor cells	Curr Gene Ther	2017	10.2174/1566523217666170102110502
Felt SA	28566376	Vesicular Stomatitis Virus	Pancreatic cancer	Entry	Tumor cells	J Virol	2017	10.1128/JVI.00461-17
Kleinlützum D	28695108	Vesicular Stomatitis Virus	Multiple Tumor types	Entry	Tumor cells	Front Oncol	2017	10.3389/fonc.2017.00127
Li Y	28711493	Adenovirus	Neuroblastoma	Cell survival	Tumor cells	Biochem Biophys Res Commun	2017	10.1016/j.bbrc.2017.07.062
Tong JG	28854921	Maraba virus	Ovarian cancer	Spatial distribution	Epithelial cells	BMC Cancer	2017	10.1186/s12885-017-3600-2
Li L	28905936	Adenovirus	Leukemia	Cell survival	Tumor cells	Acta Pharmacol Sin	2018	10.1038/aps.2017.100
Jiang B	28931212	Vesicular Stomatitis Virus and Vaccinia virus	Glioblastoma	Heterogenity	Tumor cells	Biomed Pharmacother	2017	10.1016/j.biopha.2017.09.030
Selman M	29367345	Vesicular Stomatitis Virus	Multiple Tumor types	Cell survival	Tumor cells	Sci Transl Med	2018	10.1126/scitranslmed.aao1613
Tarasova IA	29416731	Vesicular Stomatitis Virus	Glioblastoma	Interferon signaling	Tumor cells	Oncotarget	2017	10.18632/oncotarget.22751
Zamarin D	29504948	Newcastle disease virus	Multiple Tumor types	Interferon signaling	Tumor cells	J Clin Invest	2018	10.1172/JCI98047
Urbiola C	29696636	Vesicular Stomatitis Virus	Prostate cancer	Interferon signaling	Tumor cells	Int J Cancer	2018	10.1002/ijc.31556
Kurokawa C	29788332	Measles Virus	Multiple Tumor types	Interferon signaling	Tumor cells	J Natl Cancer Inst	2018	10.1093/jnci/djy033
Peters C	29793956	Herpes simplex virus	Glioblastoma	Heterogenity	Tumor cells	J Virol	2018	10.1128/JVI.00246-18
van Asten SD	29899088	Vesicular Stomatitis Virus	Multiple Tumor types	Tumor growth factors	Fibroblasts	J Virol	2018	10.1128/JVI.00260-18
Choi AH	29988465	Vaccinia virus	Breast cancer	Cell survival	Tumor cells	Mol Ther Oncolytics	2018	10.1016/j.omto.2018.04.001
Huff AL	30294666	Vesicular Stomatitis Virus	Melanoma	Cell survival	Tumor cells	Mol Ther Oncolytics	2018	10.1016/j.omto.2018.08.003
Xiao X	30337542	Alphavirus M1	Multiple Tumor types	Interferon signaling	Tumor cells	Nat Commun	2018	10.1038/s41467-018-06771-4
Ghonime MG	30352799	Herpes simplex virus	Nerve sheath tumor	Interferon signaling	Tumor cells	Cancer Immunol Res	2018	10.1158/2326-6066.CIR-18-0014
Bommareddy PK	30541787	Herpes simplex virus	Melanoma	Cell survival	Tumor cells	Sci Transl Med	2018	10.1126/scitranslmed.aau0417
Patel MR	30622322	Vesicular Stomatitis Virus	Lung cancer	Interferon signaling	Tumor cells	Cancer Gene Ther	2019	10.1038/s41417-018-0074-6
Bartee MY	30651147	Myxoma virus	Melanoma	Interferon signaling	Tumor cells	J Immunother Cancer	2019	10.1186/s40425-018-0496-6
Evgin L	30940643	Reovirus	Melanoma	Cell survival	Tumor cells	Cancer Immunol Res	2019	10.1158/2326-6066.CIR-18-0013
Muscolini M	31092575	Vesicular Stomatitis Virus	Prostate cancer	Cell survival	Tumor cells	J Virol	2019	10.1128/JVI.00626-19
Lypova N	31100952	Adenovirus	Breast cancer	Interferon signaling	Tumor cells	Cancers (Basel)	2019	10.3390/cancers11050684
Nakatake M	31236440	Vaccinia virus	Multiple Tumor types	Heterogenity	Tumor cells	Mol Ther Oncolytics	2019	10.1016/j.omto.2019.05.003
Li W	31312717	Vesicular Stomatitis Virus	Breast cancer	Cell survival	Tumor cells	Mol Ther Oncolytics	2019	10.1016/j.omto.2019.05.006
Toribio R	31723025	Sindbis Virus	Hepatocarcinoma	Cell survival	Tumor cells	J Virol	2020	10.1128/JVI.01630-19
Hoang HD	31851930	Herpes simplex virus	Breast cancer	Cell survival	Tumor cells	Cell Rep	2019	10.1016/j.celrep.2019.11.072
Wu H	31961987	Tobacco Mosaic Virus	Colorectal cancer	Heterogenity	Tumor cells	Adv Mater	2020	10.1002/adma.201904958
Tuzmen C	32042851	Herpes simplex virus	Melanoma	Viral Neutralization	Antibody	Mol Ther Methods Clin Dev	2020	10.1016/j.omtm.2019.12.013
Udayakumar TS	32366674	Vesicular Stomatitis Virus	Prostate cancer	Interferon signaling	Tumor cells	Mol Cancer Res	2020	10.1158/1541-7786.MCR-19-0836
Sun F	32461344	Vaccinia virus	Lung cancer	Interferon signaling	Tumor cells	J Immunother Cancer	2020	10.1136/jitc-2019-000294
Trus I	32466170	Zika virus	Glioblastoma	Epigenetic modification	Tumor cells	Viruses	2020	10.3390/v12050579
Arwert EN	32483388	Herpes simplex virus	Epidermoid carcinoma	Interferon signaling	Fibroblasts	Nat Cell Biology	2020	10.1038/s41556-020-0527-7
García-Romero N	32516884	Newcastle disease virus	Glioma	Interferon signaling	Tumor cells	Cells	2020	10.3390/cells9061405
Bayne RS	32529027	Vesicular Stomatitis Virus	Prostate cancer	Cell survival	Tumor cells	Mol Ther Oncolytics	2020	10.1016/j.omto.2020.05.004
Berchtold S	33076270	Vaccinia virus	Multiple Tumor types	Cell survival	Tumor cells	Int J Mol Sci	2020	10.3390/ijms21207618
Islam S	33108458	Reovirus	T-cell lymphoma	Epigenetic modification	Tumor cells	Blood Adv	2020	10.1182/bloodadvances.2020002297
